# Supplementary material for: An Emergency Department Intervention and Follow-Up to Reduce Suicide Risk in the VA: Acceptability and Effectiveness
Source: Atypon-hosted journal article supplement (doi:10.1176/appi.ps.201500082), 2016-02-01
Supplement: appi.ps.201500082.ds001.pdf [file appi.ps.201500082.ds001.pdf]

 


Psychiatry Online
